# Supplementary material for: Identification of HMMR as a prognostic biomarker for patients with lung adenocarcinoma via integrated bioinformatics analysis
Source: PeerJ. 2021 Dec 22;9:e12624. doi: 10.7717/peerj.12624 (PMC8710063; doi:10.7717/peerj.12624)
Supplement: Supplemental Information 1 [file peerj-09-12624-s001.xlsx]

## Sheet: Sheet1
Table S1. Clinical characteristics of lung cancer patients among different datasets
Characteristic	GSE101929 (n, %)	GSE75037 (n, %)	GSE18842 (n, %)	GSE19804 (n, %)	GSE19188 (n, %)	GSE31210 (n, %)	GSE42127 (n, %)	GSE50081 (n, %)	GSE68465 (n, %)	CPTAC (n, %)	TCGA (n, %)
Samples	66(100.00%)	166(100.00%)	91(100.00%)	120(100.00%)	156(100.00%)	246(100.00%)	176(100.00%)	181(100.00%)	462(100.00%)	215(100.00%)	551(100.00%)
Normal	34(51.52%)	83(50.00%)	45(49.45%)	60(50.00%)	65(41.67%)	20(8.13%)	0(0.00%)	NA	19(4.11%)	102(47.44%)	54(9.80%)
Tumor	32(48.48%)	83(50.00%)	46(50.55%)	60(50.00%)	91(58.33%)	226(91.87%)	176(100.00%)	181(100.00%)	443(95.89%)	113(52.56%)	497(90.20%)
Overall Surivival	66(100.00%)	NA	NA	NA	NA	158(64.23%)	176(100.00%)	181(100.00%)	443(95.89%)	NA	486(88.20%)
Death	40(60.61%)	NA	NA	NA	NA	19(7.72%)	64(36.36%)	75(41.44%)	236(51.08%)	NA	162(29.40%)
Alive	26(39.39%)	NA	NA	NA	NA	139(56.50%)	112(63.64%)	106(58.56%)	207(44.81%)	NA	324(58.80%)
Age	66(100.00%)	166(100.00%)	NA	120(100.00%)	NA	246(100.00%)	NA	181(100.00%)	443(95.89%)	111(51.63%)	467(84.75%)
<=65	43(65.15%)	58(34.94%)	NA	80(66.67%)	NA	190(77.24%)	NA	59(32.60%)	231(50.00%)	66(30.70%)	227(41.20%)
>65	23(34.85%)	108(65.06%)	NA	40(33.33%)	NA	56(22.76%)	NA	122(67.40%)	212(45.89%)	45(20.93%)	240(43.56%)
Gender	66(100.00%)	166(100.00%)	NA	120(100.00%)	134(85.90%)	246(100.00%)	176(100.00%)	181(100.00%)	443(95.89%)	111(51.63%)	486(88.20%)
Female	38(57.58%)	118(71.08%)	NA	120(100.00%)	34(21.80%)	130(52.85%)	83(47.16%)	83(45.86%)	220(47.62%)	38(17.64%)	264(47.91%)
Male	28(42.42%)	48(40.68%)	NA	NA	100(64.10%)	116(47.15%)	93(52.84%)	98(54.14%)	223(48.27%)	73(33.95%)	222(40.29%)
Stage	NA	33(19.88%)	NA	60(50.00%)	NA	226(91.87%)	176(100.00%)	181(100.00%)	NA	111(51.63%)	478(86.75%)
I	NA	20(12.05%)	NA	35(29.17%)	NA	168(68.29%)	112(63.64%)	127(70.17)	NA	59(27.44%)	262(47.55%)
II	NA	8(4.82%)	NA	12(10.00%)	NA	58(23.58%)	32(18.18%)	54(29.83)	NA	30(13.95%)	112(20.33%)
III	NA	5(3.01%)	NA	12(10.00%)	NA	NA	30(17.05%)	NA	NA	21(9.77%)	79(14.34%)
IV	NA	NA	NA	1(0.83%)	NA	NA	1(0.01%)	NA	NA	1(0.47%)	25(4.54%)
T classification	NA	NA	NA	NA	NA	NA	NA	181(100.00%)	441(95.45%)	111(51.63%)	483(87.66%)
T1	NA	NA	NA	NA	NA	NA	NA	57(31.49%)	150(32.47%)	28(13.02%)	163(29.58%)
T2	NA	NA	NA	NA	NA	NA	NA	122(67.40%)	251(54.33%)	70(32.56%)	260(47.19%)
T3	NA	NA	NA	NA	NA	NA	NA	2(1.10%)	28(6.06%)	13(6.05%)	41(7.44%)
T4	NA	NA	NA	NA	NA	NA	NA	NA	12(2.60%)	NA	19(3.45%)
N classification	NA	NA	NA	NA	NA	NA	NA	181(100.00%)	440(95.24%)	111(51.63%)	474(86.03%)
N0	NA	NA	NA	NA	NA	NA	NA	129(71.27%)	299(64.72%)	75(34.88%)	312(56.62%)
N1	NA	NA	NA	NA	NA	NA	NA	52(28.73%)	88(19.05%)	17(7.91%)	90(16.33%)
N2	NA	NA	NA	NA	NA	NA	NA	NA	53(11.47%)	19(8.84%)	70(12.70%)
N3	NA	NA	NA	NA	NA	NA	NA	NA	NA	NA	2(0.36%)
M classification	NA	NA	NA	NA	NA	NA	NA	181(100.00%)	NA	94(43.72%)	357(64.79%)
M0	NA	NA	NA	NA	NA	NA	NA	181(100.00%)	NA	91(42.33%)	333(60.44%)
M1	NA	NA	NA	NA	NA	NA	NA	NA	NA	3(1.40%)	24(4.36%)
Progression-free Survival	NA	NA	NA	NA	NA	NA	NA	NA	178(38.53%)	NA	NA
Death	NA	NA	NA	NA	NA	NA	NA	NA	136(29.44%)	NA	NA
Alive	NA	NA	NA	NA	NA	NA	NA	NA	42(9.09%)	NA	NA
Disease-free Survival	NA	NA	NA	NA	NA	NA	NA	181(100.00%)	NA	NA	298(54.08%)
Death	NA	NA	NA	NA	NA	NA	NA	75(41.44%)	NA	NA	188(34.12%)
Alive	NA	NA	NA	NA	NA	NA	NA	106(58.56%)	NA	NA	110(19.96%)
