# Supplementary material for: Identification of HMMR as a prognostic biomarker for patients with lung adenocarcinoma via integrated bioinformatics analysis
Source: PeerJ. 2021 Dec 22;9:e12624. doi: 10.7717/peerj.12624 (PMC8710063; doi:10.7717/peerj.12624)
Supplement: Supplemental Information 2 [file peerj-09-12624-s002.xlsx]

## Sheet: Sheet1
Table S2. The information of 115 common differently expressed genes.
No.	Gene	Type	Hub gene
1	AKR1B10	Upregulated	No
2	ANLN	Upregulated	Yes
3	CCNA2	Upregulated	Yes
4	CCNB1	Upregulated	Yes
5	CDC20	Upregulated	Yes
6	CDCA3	Upregulated	Yes
7	CDCA5	Upregulated	Yes
8	CDKN3	Upregulated	Yes
9	CEP55	Upregulated	Yes
10	COL10A1	Upregulated	No
11	CRABP2	Upregulated	No
12	CXCL13	Upregulated	No
13	FOXM1	Upregulated	Yes
14	GJB2	Upregulated	No
15	GPX2	Upregulated	No
16	HMGB3	Upregulated	No
17	HMMR	Upregulated	Yes
18	KIF11	Upregulated	Yes
19	KIF15	Upregulated	Yes
20	KIF20A	Upregulated	Yes
21	KIF2C	Upregulated	Yes
22	KIF4A	Upregulated	Yes
23	MELK	Upregulated	Yes
24	MMP1	Upregulated	No
25	MMP12	Upregulated	No
26	MMP9	Upregulated	No
27	NEK2	Upregulated	Yes
28	NMU	Upregulated	No
29	PBK	Upregulated	Yes
30	PRC1	Upregulated	Yes
31	SCG5	Upregulated	No
32	SPP1	Upregulated	No
33	TMPRSS4	Upregulated	No
34	TOP2A	Upregulated	Yes
35	TPX2	Upregulated	Yes
36	TTK	Upregulated	Yes
37	UBE2C	Upregulated	Yes
38	UBE2T	Upregulated	Yes
39	ABCA3	Downregulated	No
40	ACADL	Downregulated	No
41	ADAMTS8	Downregulated	No
42	ADH1B	Downregulated	No
43	ADRB2	Downregulated	No
44	AGER	Downregulated	No
45	ANKRD29	Downregulated	No
46	ANXA3	Downregulated	No
47	AOC3	Downregulated	No
48	AQP1	Downregulated	No
49	AQP4	Downregulated	No
50	CA4	Downregulated	No
51	CACNA2D2	Downregulated	No
52	CAV1	Downregulated	No
53	CDH5	Downregulated	No
54	CFD	Downregulated	No
55	CLDN18	Downregulated	No
56	CLIC5	Downregulated	No
57	CPB2	Downregulated	No
58	CYP4B1	Downregulated	No
59	EMCN	Downregulated	No
60	ESAM	Downregulated	No
61	FABP4	Downregulated	No
62	FAM107A	Downregulated	No
63	FBLN5	Downregulated	No
64	FCN1	Downregulated	No
65	FCN3	Downregulated	No
66	FHL1	Downregulated	No
67	FMO2	Downregulated	No
68	FOSB	Downregulated	No
69	FOXF1	Downregulated	No
70	GDF10	Downregulated	No
71	GPX3	Downregulated	No
72	HSD17B6	Downregulated	No
73	IGSF10	Downregulated	No
74	IL6	Downregulated	No
75	INMT	Downregulated	No
76	JAM2	Downregulated	No
77	LAMP3	Downregulated	No
78	LPL	Downregulated	No
79	LRRK2	Downregulated	No
80	LRRN3	Downregulated	No
81	MAMDC2	Downregulated	No
82	MARCO	Downregulated	No
83	MCEMP1	Downregulated	No
84	MFAP4	Downregulated	No
85	MT1M	Downregulated	No
86	NOSTRIN	Downregulated	No
87	PCOLCE2	Downregulated	No
88	PEBP4	Downregulated	No
89	PGC	Downregulated	No
90	PLA2G1B	Downregulated	No
91	PPBP	Downregulated	No
92	PPP1R14A	Downregulated	No
93	RAMP3	Downregulated	No
94	S100A12	Downregulated	No
95	SCGB1A1	Downregulated	No
96	SCGB3A1	Downregulated	No
97	SCGB3A2	Downregulated	No
98	SCN4B	Downregulated	No
99	SDPR	Downregulated	No
100	SFTPC	Downregulated	No
101	SFTPD	Downregulated	No
102	SLIT2	Downregulated	No
103	SOX7	Downregulated	No
104	STX11	Downregulated	No
105	SUSD2	Downregulated	No
106	TCF21	Downregulated	No
107	TGFBR3	Downregulated	No
108	TMEM100	Downregulated	No
109	TNNC1	Downregulated	No
110	UPK3B	Downregulated	No
111	VIPR1	Downregulated	No
112	WIF1	Downregulated	No
113	WISP2	Downregulated	No
114	ZBED2	Downregulated	No
115	ZBTB16	Downregulated	No
