# Supplementary material for: Identification of HMMR as a prognostic biomarker for patients with lung adenocarcinoma via integrated bioinformatics analysis
Source: PeerJ. 2021 Dec 22;9:e12624. doi: 10.7717/peerj.12624 (PMC8710063; doi:10.7717/peerj.12624)
Supplement: Supplemental Information 3 [file peerj-09-12624-s003.xlsx]

## Sheet: Biological process
Table S3.Enrichment analysis of 24 candidate hub genes in biological process
Category	Terms	No. of genes in the dataset	No.of genes in the background dataset	Percentage of genes	Fold enrichment	P-value (Hypergeometric test)	Bonferroni method	BH method	Q-value (Storey-Tibshirani method)	Mapped gene names
Biological process	Cell cycle	2	22	8.33333	68.9347	0.000381978	0.0679921	0.0679921	0.452111	PRC1; CDC20;
Biological process	Spindle assembly	1	2	4.16667	379.304	0.00264674	0.47112	0.23556	1	TPX2;
Biological process	Cell growth and/or maintenance	5	1125	20.8333	3.36158	0.0144336	1	0.661222	1	ANLN; KIF11; KIF20A; TPX2; KIF2C;
Biological process	Cell communication	10	3713	41.6667	2.03503	0.0148589	1	0.661222	1	TTK; HMMR; CDKN3; PBK; MELK; NEK2; CCNA2; PRC1; CCNB1; KIF15;
Biological process	Signal transduction	10	3934	41.6667	1.92071	0.0220369	1	0.784513	1	TTK; HMMR; CDKN3; PBK; MELK; NEK2; CCNA2; PRC1; CCNB1; KIF15;
