# Supplementary material for: Identification of HMMR as a prognostic biomarker for patients with lung adenocarcinoma via integrated bioinformatics analysis
Source: PeerJ. 2021 Dec 22;9:e12624. doi: 10.7717/peerj.12624 (PMC8710063; doi:10.7717/peerj.12624)
Supplement: Supplemental Information 4 [file peerj-09-12624-s004.xlsx]

## Sheet: Cellular component
Table S4.Enrichment analysis of 24 candidate hub genes in cellular component.
Category	Terms	No. of genes in the dataset	No.of genes in the background dataset	Percentage of genes	Fold enrichment	P-value (Hypergeometric test)	Bonferroni method	BH method	Q-value (Storey-Tibshirani method)	Mapped gene names
Cellular component	Centrosome	9	656	39.1304	8.68661	3.36663e-07	0.000263943	0.000263943	0.00175632	TTK; HMMR; KIF11; NEK2; CCNA2; CEP55; CCNB1; CDC20; KIF15;
Cellular component	Microtubule	5	129	21.7391	24.5613	1.49878e-06	0.00117504	0.000587522	0.00390946	KIF11; KIF20A; TPX2; PRC1; KIF4A;
Cellular component	Spindle microtubule	3	24	13.0435	79.2886	6.82978e-06	0.00535454	0.00133864	0.00890748	KIF11; PRC1; KIF4A;
Cellular component	Spindle pole	3	24	13.0435	79.2886	6.82978e-06	0.00535454	0.00133864	0.00890748	KIF11; TPX2; CCNB1;
Cellular component	Kinetochore	4	90	17.3913	28.1767	1.10695e-05	0.00867851	0.0017357	0.0115496	TOP2A; KIF2C; NEK2; CDC20;
Cellular component	Spindle	3	30	13.0435	63.4361	1.36155e-05	0.0106746	0.0017791	0.0118384	TTK; KIF11; CDC20;
Cellular component	Microtubule cytoskeleton	3	47	13.0435	40.496	5.34336e-05	0.041892	0.00527836	0.035123	TPX2; KIF2C; PRC1;
Cellular component	Nucleoplasm	6	449	26.087	8.46554	5.38608e-05	0.0422269	0.00527836	0.035123	KIF20A; TOP2A; CCNA2; UBE2C; CCNB1; CDC20;
Cellular component	Kinesin complex	2	9	8.69565	141.094	8.54382e-05	0.0669835	0.00744262	0.0495243	KIF11; KIF2C;
Cellular component	Nucleus	18	5847	78.2609	1.94812	0.00022837	0.179042	0.0179042	0.119137	CDCA5; HMMR; ANLN; CDKN3; PBK; KIF20A; MELK; TPX2; TOP2A; KIF2C; NEK2; CCNA2; PRC1; UBE2C; CCNB1; KIF4A; CDCA3; FOXM1;
Cellular component	Centriole	2	22	8.69565	57.758	0.000541417	0.424471	0.0385883	0.256772	TOP2A; NEK2;
Cellular component	Viral integration complex	1	1	4.34783	632.465	0.00158043	1	0.0953121	0.634221	TOP2A;
Cellular component	DNA topoisomerase complex (ATP-hydrolyzing)	1	1	4.34783	632.465	0.00158043	1	0.0953121	0.634221	TOP2A;
Cellular component	Cytoplasm	16	5684	69.5652	1.78145	0.00296751	1	0.165083	1	HMMR; ANLN; KIF11; CDKN3; PBK; MELK; TOP2A; KIF2C; NEK2; CCNA2; CCNB1; CDC20; KIF4A; CDCA3; KIF15; FOXM1;
Cellular component	Plus-end kinesin complex	1	2	4.34783	317.806	0.00315847	1	0.165083	1	KIF15;
Cellular component	Protein complex	2	65	8.69565	19.5547	0.00467798	1	0.195345	1	TOP2A; NEK2;
Cellular component	Cohesin complex	1	3	4.34783	212.222	0.00473413	1	0.195345	1	CDCA5;
Cellular component	Actomyosin contractile ring	1	3	4.34783	212.222	0.00473413	1	0.195345	1	ANLN;
Cellular component	Outer kinetochore of condensed nuclear chromosome	1	3	4.34783	212.222	0.00473413	1	0.195345	1	CCNB1;
Cellular component	Nucleolus	6	1257	26.087	3.02393	0.0114933	1	0.450536	1	ANLN; TPX2; TOP2A; KIF2C; NEK2; CCNB1;
Cellular component	Chromatin remodeling complex	1	8	4.34783	79.749	0.0125767	1	0.469531	1	KIF11;
Cellular component	Nuclear chromosome	1	17	4.34783	37.5537	0.0265447	1	0.928975	1	TOP2A;
Cellular component	Anaphase-promoting complex	1	18	4.34783	35.4686	0.028085	1	0.928975	1	UBE2C;
Cellular component	Cytoskeleton	3	427	13.0435	4.45825	0.0287386	1	0.928975	1	TPX2; KIF2C; PRC1;
Cellular component	Chromosome, centromeric region	1	19	4.34783	33.6028	0.0296229	1	0.928975	1	KIF2C;
