# Supplementary material for: Identification of HMMR as a prognostic biomarker for patients with lung adenocarcinoma via integrated bioinformatics analysis
Source: PeerJ. 2021 Dec 22;9:e12624. doi: 10.7717/peerj.12624 (PMC8710063; doi:10.7717/peerj.12624)
Supplement: Supplemental Information 5 [file peerj-09-12624-s005.xlsx]

## Sheet: Molecular function
Table S5.Enrichment analysis of 24 candidate hub genes in molecullar function.
Category	Terms	No. of genes in the dataset	No.of genes in the background dataset	Percentage of genes	Fold enrichment	P-value (Hypergeometric test)	Bonferroni method	BH method	Q-value (Storey-Tibshirani method)	Mapped gene names
Molecullar function	Motor activity	3	79	12.5	28.7588	0.000151	0.0338241	0.0223298	0.144197	KIF11; KIF20A; KIF2C;
Molecullar function	Kinase binding	2	16	8.33333	94.7744	0.000199374	0.0446597	0.0223298	0.144197	CCNA2; CCNB1;
Molecullar function	Protein serine/threonine kinase activity	3	301	12.5	7.54869	0.00708833	1	0.295667	1	PBK; MELK; NEK2;
Molecullar function	DNA topoisomerase activity	1	6	4.16667	126.862	0.00791966	1	0.295667	1	TOP2A;
Molecullar function	Protein domain specific binding	1	6	4.16667	126.862	0.00791966	1	0.295667	1	KIF15;
Molecullar function	ATP binding	1	6	4.16667	126.862	0.00791966	1	0.295667	1	TPX2;
Molecullar function	Protein binding	2	182	8.33333	8.33656	0.0239435	1	0.766192	1	CDC20; KIF15;
Molecullar function	Protein threonine/tyrosine kinase activity	1	28	4.16667	27.2204	0.0364473	1	1	1	TTK;
Molecullar function	Protein tyrosine/serine/threonine phosphatase activity	1	37	4.16667	20.601	0.0478897	1	1	1	CDKN3;
