# Supplementary material for: Identification of HMMR as a prognostic biomarker for patients with lung adenocarcinoma via integrated bioinformatics analysis
Source: PeerJ. 2021 Dec 22;9:e12624. doi: 10.7717/peerj.12624 (PMC8710063; doi:10.7717/peerj.12624)
Supplement: Supplemental Information 6 [file peerj-09-12624-s006.xlsx]

## Sheet: Biological pathway
Table S4. Enrichment analysis of 24 candidate hub genes in biological pathway
Category	Terms	No. of genes in the dataset	No.of genes in the background dataset	Percentage of genes	Fold enrichment	P-value (Hypergeometric test)	Bonferroni method	BH method	Q-value (Storey-Tibshirani method)	Mapped gene names
Biological pathway	Kinesins	4	21	26.6667	79.9814	1.22425e-07	0.000204205	0.000150148	0.000960412	KIF11; KIF2C; KIF4A; KIF15;
Biological pathway	Cell Cycle, Mitotic	8	317	53.3333	10.5884	1.80034e-07	0.000300296	0.000150148	0.000960412	KIF20A; TOP2A; KIF2C; NEK2; CCNA2; UBE2C; CCNB1; CDC20;
Biological pathway	FOXM1 transcription factor network	4	42	26.6667	40.0002	2.22306e-06	0.00370806	0.00123197	0.00788021	NEK2; CCNA2; CCNB1; FOXM1;
Biological pathway	PLK1 signaling events	5	104	33.3333	20.1852	2.95436e-06	0.00492788	0.00123197	0.00788021	KIF20A; TPX2; PRC1; CCNB1; CDC20;
Biological pathway	Polo-like kinase signaling events in the cell cycle	5	109	33.3333	19.2594	3.72813e-06	0.00621853	0.00124371	0.00795528	KIF20A; TPX2; PRC1; CCNB1; CDC20;
Biological pathway	Phosphorylation of Emi1	3	20	20	63.0362	1.22108e-05	0.0203676	0.0033946	0.0217133	UBE2C; CCNB1; CDC20;
Biological pathway	APC/C:Cdc20 mediated degradation of Cyclin B	3	22	20	57.3082	1.64481e-05	0.0274353	0.00391934	0.0250698	UBE2C; CCNB1; CDC20;
Biological pathway	APC-Cdc20 mediated degradation of Nek2A	3	23	20	54.8177	1.88882e-05	0.0315055	0.00393818	0.0251903	NEK2; UBE2C; CDC20;
Biological pathway	M Phase	5	158	33.3333	13.2869	2.29988e-05	0.038362	0.00426245	0.0272645	KIF20A; KIF2C; NEK2; UBE2C; CDC20;
Biological pathway	G2/M Transition	4	96	26.6667	17.5024	6.1149e-05	0.101996	0.0101996	0.0652413	NEK2; CCNA2; UBE2C; CCNB1;
Biological pathway	Mitotic G2-G2/M phases	4	99	26.6667	16.9721	6.90001e-05	0.115092	0.0104629	0.0669254	NEK2; CCNA2; UBE2C; CCNB1;
Biological pathway	Factors involved in megakaryocyte development and platelet production	4	119	26.6667	14.1199	0.0001415	0.236023	0.0196685	0.125809	KIF11; KIF2C; KIF4A; KIF15;
Biological pathway	Mitotic M-M/G1 phases	5	242	33.3333	8.67511	0.000176954	0.29516	0.0227046	0.145228	KIF20A; KIF2C; NEK2; UBE2C; CDC20;
Biological pathway	DNA Replication	5	261	33.3333	8.04361	0.000252404	0.42101	0.0300721	0.192354	KIF20A; KIF2C; NEK2; UBE2C; CDC20;
Biological pathway	Cyclin A/B1 associated events during G2/M transition	2	14	13.3333	60.1213	0.000475163	0.792572	0.0528381	0.337976	CCNA2; CCNB1;
Biological pathway	APC/C:Cdc20 mediated degradation of mitotic proteins	3	71	20	17.7631	0.000569014	0.949115	0.0558651	0.357338	UBE2C; CCNB1; CDC20;
Biological pathway	Activation of APC/C and APC/C:Cdc20 mediated degradation of mitotic proteins	3	72	20	17.5164	0.000592902	0.988961	0.0558651	0.357338	UBE2C; CCNB1; CDC20;
Biological pathway	Conversion from APC/C:Cdc20 to APC/C:Cdh1 in late anaphase	2	16	13.3333	52.6109	0.000624864	1	0.0558651	0.357338	UBE2C; CDC20;
Biological pathway	Regulation of APC/C activators between G1/S and early anaphase	3	78	20	16.1691	0.000749812	1	0.0558651	0.357338	UBE2C; CCNB1; CDC20;
Biological pathway	Phosphorylation of the APC/C	2	18	13.3333	46.7685	0.000794508	1	0.0558651	0.357338	UBE2C; CCNB1;
Biological pathway	Mitotic Telophase /Cytokinesis	2	18	13.3333	46.7685	0.000794508	1	0.0558651	0.357338	KIF20A; UBE2C;
Biological pathway	Inactivation of APC/C via direct inhibition of the APC/C complex	2	18	13.3333	46.7685	0.000794508	1	0.0558651	0.357338	UBE2C; CDC20;
Biological pathway	Inhibition of the proteolytic activity of APC/C required for the onset of anaphase by mitotic spindle checkpoint components	2	18	13.3333	46.7685	0.000794508	1	0.0558651	0.357338	UBE2C; CDC20;
Biological pathway	APC/C-mediated degradation of cell cycle proteins	3	81	20	15.5704	0.000837307	1	0.0558651	0.357338	UBE2C; CCNB1; CDC20;
Biological pathway	Regulation of mitotic cell cycle	3	81	20	15.5704	0.000837307	1	0.0558651	0.357338	UBE2C; CCNB1; CDC20;
Biological pathway	Mitotic Spindle Checkpoint	2	19	13.3333	44.3082	0.000886757	1	0.0568889	0.363886	UBE2C; CDC20;
Biological pathway	Signaling by Aurora kinases	3	98	20	12.8697	0.00145663	1	0.0893566	0.571564	KIF20A; TPX2; KIF2C;
Biological pathway	Mitotic Prometaphase	3	99	20	12.7397	0.00149999	1	0.0893566	0.571564	KIF2C; UBE2C; CDC20;
Biological pathway	Cell Cycle Checkpoints	3	118	20	10.6885	0.00248385	1	0.142864	0.913821	UBE2C; CCNB1; CDC20;
Biological pathway	Mitotic G1-G1/S phases	3	140	20	9.00903	0.0040354	1	0.221972	1	TOP2A; UBE2C; CCNB1;
Biological pathway	Aurora B signaling	2	41	13.3333	20.5389	0.00412538	1	0.221972	1	KIF20A; KIF2C;
Biological pathway	Phosphorylation of proteins involved in the G2/M transition by Cyclin A:Cdc2 complexes	1	3	6.66667	140.613	0.0071383	1	0.372084	1	CCNA2;
Biological pathway	G2/M DNA replication checkpoint	1	4	6.66667	105.547	0.00950714	1	0.480543	1	CCNB1;
Biological pathway	Hemostasis	4	375	26.6667	4.48097	0.0100325	1	0.482935	1	KIF11; KIF2C; KIF4A; KIF15;
Biological pathway	APC/C:Cdc20 mediated degradation of Securin	2	66	13.3333	12.7602	0.0104267	1	0.482935	1	UBE2C; CDC20;
Biological pathway	APC/C:Cdh1 mediated degradation of Cdc20 and other APC/C:Cdh1 targeted proteins in late mitosis/early G1	2	69	13.3333	12.2055	0.0113568	1	0.482935	1	UBE2C; CDC20;
Biological pathway	Cdc20:Phospho-APC/C mediated degradation of Cyclin A	2	69	13.3333	12.2055	0.0113568	1	0.482935	1	UBE2C; CDC20;
Biological pathway	Recruitment of mitotic centrosome proteins and complexes	2	70	13.3333	12.0311	0.0116748	1	0.482935	1	NEK2; CCNB1;
Biological pathway	Centrosome maturation	2	70	13.3333	12.0311	0.0116748	1	0.482935	1	NEK2; CCNB1;
Biological pathway	SCF-beta-TrCP mediated degradation of Emi1	2	70	13.3333	12.0311	0.0116748	1	0.482935	1	UBE2C; CDC20;
Biological pathway	Chk1/Chk2(Cds1) mediated inactivation of Cyclin B:Cdk1 complex	1	5	6.66667	84.4801	0.0118707	1	0.482935	1	CCNB1;
Biological pathway	Cyclin B2 mediated events	1	6	6.66667	70.4235	0.014229	1	0.556984	1	CCNB1;
Biological pathway	p73 transcription factor network	2	78	13.3333	10.7973	0.0143587	1	0.556984	1	CCNA2; CCNB1;
Biological pathway	ATR signaling pathway	3	250	20	5.04522	0.0198008	1	0.750631	1	CCNA2; CCNB1; UBE2T;
Biological pathway	E2F-enabled inhibition of pre-replication complex formation	1	10	6.66667	42.2822	0.0236098	1	0.875137	1	CCNB1;
Biological pathway	Recruitment of NuMA to mitotic centrosomes	1	12	6.66667	35.2411	0.0282689	1	1	1	CCNB1;
Biological pathway	G1/S Transition	2	117	13.3333	7.19853	0.030757	1	1	1	UBE2C; CCNB1;
Biological pathway	ID	1	14	6.66667	30.2102	0.0329072	1	1	1	CCNA2;
Biological pathway	ATM pathway	3	307	20	4.10851	0.0338505	1	1	1	CCNA2; CCNB1; UBE2T;
Biological pathway	Hedgehog	1	16	6.66667	26.4363	0.0375249	1	1	1	CCNB1;
Biological pathway	Polo-like kinase mediated events	1	18	6.66667	23.5006	0.0421219	1	1	1	UBE2C;
Biological pathway	G0 and Early G1	1	21	6.66667	20.1449	0.0489791	1	1	1	TOP2A;
