# Supplementary material for: Identification of HMMR as a prognostic biomarker for patients with lung adenocarcinoma via integrated bioinformatics analysis
Source: PeerJ. 2021 Dec 22;9:e12624. doi: 10.7717/peerj.12624 (PMC8710063; doi:10.7717/peerj.12624)
Supplement: Supplemental Information 7 [file peerj-09-12624-s007.xlsx]

## Sheet: Sheet1
Table S5. Gene set enrichment analysis for the high HMMR expression in LUAD
NAME	ES	NES	NOM p-val	FDR q-val
GO_MITOTIC_NUCLEAR_DIVISION	0.68809	2.49551	0	0
GO_MEIOTIC_CELL_CYCLE_PROCESS	0.725881	2.48886	0	0
GO_ORGANELLE_FISSION	0.641247	2.4713	0	0
GO_MEIOTIC_CHROMOSOME_SEGREGATION	0.782318	2.465	0	0
GO_CHROMOSOME_ORGANIZATION_INVOLVED_IN_MEIOTIC_CELL_CYCLE	0.799815	2.45705	0	0
GO_NUCLEAR_CHROMOSOME_SEGREGATION	0.717383	2.44189	0	0
GO_MITOTIC_SISTER_CHROMATID_SEGREGATION	0.758533	2.43885	0	0
GO_MEIOSIS_I_CELL_CYCLE_PROCESS	0.741181	2.43352	0	0
GO_CHROMOSOME_SEGREGATION	0.700221	2.42681	0	0
GO_REGULATION_OF_NUCLEAR_DIVISION	0.632385	2.40434	0	0
GO_SISTER_CHROMATID_SEGREGATION	0.736106	2.39957	0	0
GO_MEIOTIC_CELL_CYCLE	0.668352	2.39526	0	0
GO_CELL_CYCLE_G2_M_PHASE_TRANSITION	0.637917	2.364	0	7.78676e-05
GO_NEGATIVE_REGULATION_OF_MITOTIC_CELL_CYCLE	0.574646	2.35517	0	0.000146535
GO_REGULATION_OF_CELL_CYCLE_PHASE_TRANSITION	0.576506	2.35436	0	0.000136766
GO_CYTOSKELETON_DEPENDENT_CYTOKINESIS	0.614501	2.35344	0	0.000128218
GO_NEGATIVE_REGULATION_OF_CELL_CYCLE_PHASE_TRANSITION	0.59161	2.35288	0	0.000120676
GO_MICROTUBULE_CYTOSKELETON_ORGANIZATION_INVOLVED_IN_MITOSIS	0.686378	2.34191	0	0.00017021
GO_NEGATIVE_REGULATION_OF_CELL_CYCLE_PROCESS	0.568812	2.33151	0	0.000214529
GO_REGULATION_OF_CELL_CYCLE_G2_M_PHASE_TRANSITION	0.660201	2.33028	0	0.000203803
GO_POSITIVE_REGULATION_OF_DNA_REPLICATION	0.709211	2.32667	0	0.000242301
GO_MITOTIC_CYTOKINESIS	0.617195	2.32114	0	0.000231288
GO_DOUBLE_STRAND_BREAK_REPAIR	0.643098	2.32081	0	0.000221232
GO_SPINDLE_ORGANIZATION	0.64097	2.31801	0	0.000254192
GO_MITOTIC_SPINDLE_ORGANIZATION	0.697437	2.31766	0	0.000244024
GO_RECOMBINATIONAL_REPAIR	0.70486	2.31489	0	0.000273572
GO_CHROMOSOME_SEPARATION	0.732255	2.31245	0	0.000300932
GO_DNA_RECOMBINATION	0.627519	2.31225	0	0.000290184
GO_DNA_REPLICATION	0.681008	2.30893	0	0.000314263
GO_DNA_REPAIR	0.615229	2.3089	0	0.000303787
GO_METAPHASE_ANAPHASE_TRANSITION_OF_CELL_CYCLE	0.772424	2.30769	0	0.000293988
GO_NEGATIVE_REGULATION_OF_CELL_CYCLE_G2_M_PHASE_TRANSITION	0.690988	2.30129	0	0.000404679
GO_REGULATION_OF_SISTER_CHROMATID_SEGREGATION	0.725819	2.30125	0	0.000392416
GO_RESPONSE_TO_HEAT	0.586115	2.29273	0	0.000440124
GO_POSITIVE_REGULATION_OF_TELOMERE_MAINTENANCE	0.68106	2.29127	0	0.000427549
GO_HOMOLOGOUS_CHROMOSOME_SEGREGATION	0.739725	2.2839	0	0.000505758
GO_CHROMOSOME_LOCALIZATION	0.712197	2.28145	0	0.000519448
GO_CELLULAR_RESPONSE_TO_HEAT	0.608186	2.27416	0	0.000701617
GO_DNA_DEPENDENT_DNA_REPLICATION	0.74542	2.27192	0	0.000731376
GO_REGULATION_OF_HEMATOPOIETIC_PROGENITOR_CELL_DIFFERENTIATION	0.679975	2.26721	0	0.000768858
GO_MITOTIC_CELL_CYCLE_CHECKPOINT	0.609552	2.2648	0	0.000774795
GO_REGULATION_OF_CHROMOSOME_SEPARATION	0.751582	2.26393	0	0.000756348
GO_HEMATOPOIETIC_STEM_CELL_DIFFERENTIATION	0.665008	2.26382	0	0.000738758
GO_CYTOKINESIS	0.566035	2.25778	0	0.000745027
GO_TELOMERE_ORGANIZATION	0.646241	2.2478	0	0.00081704
GO_REGULATION_OF_HEMATOPOIETIC_STEM_CELL_DIFFERENTIATION	0.712577	2.24729	0	0.000799278
GO_REGULATION_OF_CHROMOSOME_SEGREGATION	0.726212	2.24597	0	0.000800058
GO_CELL_CYCLE_G1_S_PHASE_TRANSITION	0.566096	2.22845	0	0.00100471
GO_HISTONE_PHOSPHORYLATION	0.68451	2.2283	0	0.000984204
GO_MEMBRANE_DISASSEMBLY	0.783352	2.2282	0	0.000964519
GO_CELL_CYCLE_CHECKPOINT	0.596211	2.22796	0	0.000945607
GO_POSITIVE_REGULATION_OF_MITOTIC_NUCLEAR_DIVISION	0.629661	2.22445	0	0.00101295
GO_POSTREPLICATION_REPAIR	0.682587	2.21813	0	0.00110784
GO_MITOTIC_SPINDLE_ASSEMBLY	0.694922	2.21519	0	0.00113986
GO_NEGATIVE_REGULATION_OF_NUCLEAR_DIVISION	0.691853	2.21209	0	0.00119282
GO_DNA_BIOSYNTHETIC_PROCESS	0.546623	2.20598	0	0.00124896
GO_SPINDLE_ASSEMBLY	0.631677	2.20556	0	0.00122705
GO_POSITIVE_REGULATION_OF_CELL_CYCLE_PHASE_TRANSITION	0.622752	2.20108	0	0.00129138
GO_PROTEIN_MODIFICATION_BY_SMALL_PROTEIN_REMOVAL	0.535658	2.19998	0	0.00131411
GO_REGULATION_OF_CYCLIN_DEPENDENT_PROTEIN_KINASE_ACTIVITY	0.567036	2.19708	0	0.00140328
GO_REGULATION_OF_MEIOTIC_CELL_CYCLE	0.649421	2.19425	0	0.00145622
GO_REGULATION_OF_STEM_CELL_DIFFERENTIATION	0.608221	2.19037	0	0.00151414
GO_METAPHASE_PLATE_CONGRESSION	0.715878	2.18745	0	0.0015058
GO_NEGATIVE_REGULATION_OF_METAPHASE_ANAPHASE_TRANSITION_OF_CELL_CYCLE	0.786822	2.18654	0	0.00150109
GO_PROTEIN_DNA_COMPLEX_SUBUNIT_ORGANIZATION	0.624216	2.18637	0	0.001478
GO_REGULATION_OF_ATPASE_ACTIVITY	0.563042	2.18179	0	0.00152884
GO_PROTEIN_LOCALIZATION_TO_CHROMOSOME	0.667044	2.18081	0	0.00151971
GO_NEGATIVE_REGULATION_OF_CHROMOSOME_SEGREGATION	0.765653	2.18068	0	0.00151731
GO_SCF_DEPENDENT_PROTEASOMAL_UBIQUITIN_DEPENDENT_PROTEIN_CATABOLIC_PROCESS	0.626292	2.18008	0	0.00149532
GO_CHROMOSOME_CONDENSATION	0.798372	2.17906	0	0.00149095
GO_REGULATION_OF_DNA_REPLICATION	0.645945	2.17564	0	0.00156599
GO_ANAPHASE_PROMOTING_COMPLEX_DEPENDENT_CATABOLIC_PROCESS	0.775126	2.17054	0	0.00164176
GO_TRANSCRIPTION_COUPLED_NUCLEOTIDE_EXCISION_REPAIR	0.649228	2.16811	0	0.00171603
GO_CELL_CYCLE_DNA_REPLICATION	0.800064	2.16622	0	0.00173316
GO_POSITIVE_REGULATION_OF_TELOMERE_MAINTENANCE_VIA_TELOMERE_LENGTHENING	0.688397	2.16489	0	0.00176238
GO_DNA_GEOMETRIC_CHANGE	0.678358	2.15984	0	0.00198781
GO_DNA_CONFORMATION_CHANGE	0.640289	2.15261	0	0.00226058
GO_POSITIVE_REGULATION_OF_CELL_CYCLE_PROCESS	0.545088	2.15118	0	0.00228471
GO_ACTIVATION_OF_INNATE_IMMUNE_RESPONSE	0.56274	2.14797	0	0.00235733
GO_SIGNAL_TRANSDUCTION_IN_RESPONSE_TO_DNA_DAMAGE	0.537854	2.14788	0	0.00232787
GO_DNA_INTEGRITY_CHECKPOINT	0.577029	2.14502	0	0.00237702
GO_POSITIVE_REGULATION_OF_TELOMERE_CAPPING	0.745058	2.14283	0	0.00239847
GO_KINETOCHORE_ORGANIZATION	0.866804	2.14248	0	0.00237964
GO_NUCLEOSIDE_MONOPHOSPHATE_METABOLIC_PROCESS	0.598207	2.13716	0	0.0024615
GO_REGULATION_OF_RESPONSE_TO_DNA_DAMAGE_STIMULUS	0.522441	2.13573	0	0.00244417
GO_NEGATIVE_REGULATION_OF_CHROMOSOME_ORGANIZATION	0.620112	2.13492	0	0.00244654
GO_ATTACHMENT_OF_SPINDLE_MICROTUBULES_TO_KINETOCHORE	0.804047	2.13459	0	0.00241841
GO_POSITIVE_REGULATION_OF_MITOTIC_CELL_CYCLE	0.580077	2.12982	0	0.00260762
GO_NUCLEUS_ORGANIZATION	0.568128	2.12894	0	0.00263258
GO_SIGNAL_TRANSDUCTION_INVOLVED_IN_CELL_CYCLE_CHECKPOINT	0.592163	2.12877	0	0.00260333
GO_HISTONE_EXCHANGE	0.798266	2.12871	0	0.00257472
GO_POSITIVE_REGULATION_OF_NUCLEAR_DIVISION	0.573428	2.12819	0	0.00255748
GO_REGULATION_OF_SIGNAL_TRANSDUCTION_BY_P53_CLASS_MEDIATOR	0.557549	2.12614	0	0.00259953
GO_FEMALE_MEIOTIC_NUCLEAR_DIVISION	0.734351	2.1256	0	0.0026005
GO_MULTI_ORGANISM_LOCALIZATION	0.629146	2.1249	0	0.00258677
GO_POSITIVE_REGULATION_OF_ATPASE_ACTIVITY	0.615832	2.12318	0	0.00259119
GO_REGULATION_OF_CYTOKINESIS	0.614289	2.12155	0	0.00265713
GO_INNATE_IMMUNE_RESPONSE_ACTIVATING_SIGNAL_TRANSDUCTION	0.581387	2.12116	0	0.0026528
GO_REGULATION_OF_UBIQUITIN_PROTEIN_LIGASE_ACTIVITY	0.718222	2.12045	0	0.00267271
GO_MITOTIC_METAPHASE_PLATE_CONGRESSION	0.71884	2.11747	0	0.00279082
GO_PURINE_NUCLEOSIDE_MONOPHOSPHATE_BIOSYNTHETIC_PROCESS	0.792141	2.11662	0	0.00281768
GO_REGULATION_OF_MRNA_CATABOLIC_PROCESS	0.537416	2.11568	0	0.0028411
GO_REGULATION_OF_CELLULAR_RESPONSE_TO_HEAT	0.61661	2.11454	0	0.00284056
GO_NUCLEOTIDE_EXCISION_REPAIR	0.57741	2.11434	0	0.00281325
GO_DNA_SYNTHESIS_INVOLVED_IN_DNA_REPAIR	0.66563	2.11389	0	0.00283059
GO_SISTER_CHROMATID_COHESION	0.713987	2.11355	0	0.00280388
GO_CENTROMERE_COMPLEX_ASSEMBLY	0.804446	2.11295	0	0.00281994
GO_INTERLEUKIN_1_MEDIATED_SIGNALING_PATHWAY	0.597891	2.10835	0	0.00299624
GO_POSITIVE_REGULATION_OF_DNA_METABOLIC_PROCESS	0.523839	2.10731	0	0.0029951
GO_NUCLEOSIDE_MONOPHOSPHATE_BIOSYNTHETIC_PROCESS	0.696069	2.10605	0	0.00301787
GO_TELOMERE_MAINTENANCE_VIA_TELOMERE_LENGTHENING	0.599061	2.10564	0	0.00301873
GO_DNA_PACKAGING	0.644051	2.10533	0	0.00302535
GO_NCRNA_TRANSCRIPTION	0.596136	2.10508	0	0.00299858
GO_POSITIVE_REGULATION_OF_INNATE_IMMUNE_RESPONSE	0.543059	2.10467	0	0.00298985
GO_ATP_DEPENDENT_CHROMATIN_REMODELING	0.681471	2.1021	0	0.00304992
GO_POSITIVE_REGULATION_OF_DNA_BIOSYNTHETIC_PROCESS	0.598468	2.101	0	0.00314974
GO_NUCLEOSOME_ORGANIZATION	0.65756	2.09922	0	0.0032009
GO_DNA_TEMPLATED_TRANSCRIPTION_TERMINATION	0.655521	2.09702	0	0.00332385
GO_NON_RECOMBINATIONAL_REPAIR	0.602081	2.096	0	0.00335565
GO_PURINE_NUCLEOBASE_METABOLIC_PROCESS	0.770206	2.09548	0.00192678	0.00335098
GO_MITOTIC_SISTER_CHROMATID_COHESION	0.762193	2.09523	0	0.00332995
GO_POSITIVE_REGULATION_OF_CHROMOSOME_SEGREGATION	0.736018	2.09448	0	0.00332686
GO_REGULATION_OF_DNA_DEPENDENT_DNA_REPLICATION	0.739925	2.09444	0	0.00329981
GO_DNA_DAMAGE_RESPONSE_SIGNAL_TRANSDUCTION_BY_P53_CLASS_MEDIATOR	0.51526	2.09434	0	0.0032732
GO_REGULATION_OF_TELOMERE_CAPPING	0.677515	2.09259	0	0.00335582
GO_PROTEASOMAL_PROTEIN_CATABOLIC_PROCESS	0.441841	2.08792	0	0.0036089
GO_TRANSLESION_SYNTHESIS	0.662376	2.08656	0	0.00365186
GO_POSITIVE_REGULATION_OF_CELL_CYCLE	0.505139	2.08645	0	0.00362333
GO_REGULATION_OF_TELOMERE_MAINTENANCE_VIA_TELOMERE_LENGTHENING	0.614553	2.08623	0	0.0036191
GO_PROTEIN_K11_LINKED_UBIQUITINATION	0.694022	2.08458	0	0.00371189
GO_NUCLEAR_TRANSPORT	0.524165	2.08268	0	0.00374776
GO_CELLULAR_RESPONSE_TO_OXYGEN_LEVELS	0.480289	2.08216	0	0.00374873
GO_RNA_DEPENDENT_DNA_BIOSYNTHETIC_PROCESS	0.58596	2.0815	0	0.00377801
GO_REGULATION_OF_SPINDLE_ORGANIZATION	0.64929	2.08149	0	0.00374982
GO_SIGNAL_TRANSDUCTION_BY_P53_CLASS_MEDIATOR	0.511962	2.08139	0	0.00372204
GO_TERMINATION_OF_RNA_POLYMERASE_II_TRANSCRIPTION	0.721089	2.08009	0	0.00377305
GO_RNA_CAPPING	0.688	2.07925	0	0.0037976
GO_NUCLEOBASE_METABOLIC_PROCESS	0.676529	2.07875	0	0.00377725
GO_REGULATION_OF_TRANSCRIPTION_FROM_RNA_POLYMERASE_II_PROMOTER_IN_RESPONSE_TO_HYPOXIA	0.639162	2.0786	0	0.00376124
GO_MITOTIC_DNA_INTEGRITY_CHECKPOINT	0.55231	2.0781	0	0.00375919
GO_NADH_METABOLIC_PROCESS	0.676239	2.0773	0	0.00379434
GO_PROTEIN_FOLDING	0.525282	2.07688	0	0.00380133
GO_HOMOLOGOUS_RECOMBINATION	0.68561	2.07618	0	0.00378838
GO_RNA_LOCALIZATION	0.586227	2.07173	0	0.00397117
GO_REGULATION_OF_CENTROSOME_CYCLE	0.62842	2.06902	0	0.00403237
GO_NUCLEOSOME_ASSEMBLY	0.702319	2.06779	0	0.00403669
GO_REGULATION_OF_DNA_METABOLIC_PROCESS	0.507969	2.06448	0	0.00426062
GO_RESPONSE_TO_TEMPERATURE_STIMULUS	0.482832	2.06119	0	0.00441557
GO_PORE_COMPLEX_ASSEMBLY	0.7272	2.05956	0	0.00445208
GO_SNRNA_TRANSCRIPTION	0.598132	2.05889	0	0.00444001
GO_DNA_DEPENDENT_DNA_REPLICATION_MAINTENANCE_OF_FIDELITY	0.706287	2.05828	0.00202429	0.00444882
GO_DNA_REPLICATION_INDEPENDENT_NUCLEOSOME_ORGANIZATION	0.788576	2.05723	0	0.00450549
GO_MODULATION_BY_VIRUS_OF_HOST_CELLULAR_PROCESS	0.685399	2.05577	0	0.00455874
GO_ESTABLISHMENT_OF_TISSUE_POLARITY	0.554091	2.05282	0	0.00473623
GO_MEIOTIC_CHROMOSOME_SEPARATION	0.783364	2.0512	0	0.00478602
GO_REGULATION_OF_DOUBLE_STRAND_BREAK_REPAIR	0.578766	2.05087	0	0.00476839
GO_NUCLEOSIDE_METABOLIC_PROCESS	0.546699	2.05064	0	0.00476234
GO_REGULATION_OF_CHROMOSOME_ORGANIZATION	0.536662	2.04987	0	0.00477527
GO_G2_DNA_DAMAGE_CHECKPOINT	0.642218	2.04947	0	0.00477353
GO_DNA_REPLICATION_INITIATION	0.810352	2.04944	0	0.00475278
GO_PURINE_NUCLEOSIDE_MONOPHOSPHATE_METABOLIC_PROCESS	0.624446	2.04674	0	0.004915
GO_HISTONE_MONOUBIQUITINATION	0.672839	2.04665	0	0.00489094
GO_HEMATOPOIETIC_PROGENITOR_CELL_DIFFERENTIATION	0.491566	2.04619	0	0.00489973
GO_KINETOCHORE_ASSEMBLY	0.818775	2.04457	0	0.00495766
GO_TRNA_METABOLIC_PROCESS	0.590415	2.04395	0	0.00495109
GO_PTERIDINE_CONTAINING_COMPOUND_METABOLIC_PROCESS	0.630114	2.0421	0	0.00500816
GO_NAD_METABOLIC_PROCESS	0.607008	2.04202	0	0.00497817
GO_POSITIVE_REGULATION_OF_MITOTIC_SISTER_CHROMATID_SEGREGATION	0.741598	2.03981	0	0.00510172
GO_SPINDLE_LOCALIZATION	0.644837	2.03804	0	0.00519206
GO_MITOTIC_CHROMOSOME_CONDENSATION	0.866164	2.03799	0	0.00516152
GO_RNA_3_END_PROCESSING	0.597249	2.03778	0	0.00513708
GO_MRNA_3_END_PROCESSING	0.619929	2.03718	0	0.0051357
GO_RIBONUCLEOSIDE_MONOPHOSPHATE_BIOSYNTHETIC_PROCESS	0.689944	2.03534	0	0.00524925
GO_MODULATION_BY_SYMBIONT_OF_HOST_CELLULAR_PROCESS	0.648267	2.03465	0	0.00524774
GO_RIBONUCLEOPROTEIN_COMPLEX_BIOGENESIS	0.578574	2.034	0.0019084	0.00524727
GO_RNA_SPLICING_VIA_TRANSESTERIFICATION_REACTIONS	0.559993	2.03354	0	0.00524792
GO_REGULATION_OF_UBIQUITIN_PROTEIN_TRANSFERASE_ACTIVITY	0.548792	2.03301	0	0.00524206
GO_RESPONSE_TO_IONIZING_RADIATION	0.513697	2.03251	0	0.00523208
GO_ESTABLISHMENT_OF_MITOTIC_SPINDLE_LOCALIZATION	0.666499	2.03182	0	0.00524805
GO_REGULATION_OF_DNA_REPAIR	0.556765	2.03079	0	0.00525757
GO_NUCLEOBASE_BIOSYNTHETIC_PROCESS	0.786646	2.03021	0	0.00525453
GO_POSITIVE_REGULATION_OF_RESPONSE_TO_BIOTIC_STIMULUS	0.504316	2.02966	0	0.00526987
GO_PYRIMIDINE_CONTAINING_COMPOUND_METABOLIC_PROCESS	0.53211	2.02766	0	0.00535672
GO_REPLICATION_FORK_PROCESSING	0.705946	2.02719	0	0.00536059
GO_DNA_STRAND_ELONGATION	0.84376	2.02583	0	0.00539648
GO_RNA_EXPORT_FROM_NUCLEUS	0.621714	2.02468	0	0.00542982
GO_PROTEIN_SUMOYLATION	0.603947	2.02132	0	0.00567936
GO_REGULATION_OF_DNA_TEMPLATED_TRANSCRIPTION_IN_RESPONSE_TO_STRESS	0.534557	2.02004	0	0.00572152
GO_MRNA_MODIFICATION	0.751487	2.01412	0	0.00609449
GO_DNA_UNWINDING_INVOLVED_IN_DNA_REPLICATION	0.855469	2.01346	0	0.00611402
GO_CHROMATIN_REMODELING_AT_CENTROMERE	0.820819	2.01153	0	0.00625065
GO_INTERSTRAND_CROSS_LINK_REPAIR	0.666983	2.01101	0	0.00624469
GO_RIBONUCLEOSIDE_MONOPHOSPHATE_METABOLIC_PROCESS	0.584198	2.01019	0	0.00630948
GO_POSITIVE_REGULATION_OF_PROTEIN_LOCALIZATION_TO_NUCLEUS	0.550246	2.01009	0	0.00628323
GO_HISTONE_UBIQUITINATION	0.615512	2.00854	0	0.00634853
GO_DNA_DAMAGE_RESPONSE_DETECTION_OF_DNA_DAMAGE	0.674255	2.00754	0	0.00639583
GO_MALE_MEIOTIC_NUCLEAR_DIVISION	0.651335	2.00748	0	0.0063855
GO_REGULATION_OF_MRNA_METABOLIC_PROCESS	0.520621	2.00716	0	0.00640341
GO_FOLIC_ACID_CONTAINING_COMPOUND_METABOLIC_PROCESS	0.663543	2.00453	0	0.00656686
GO_CELLULAR_PROTEIN_COMPLEX_DISASSEMBLY	0.515521	2.00429	0	0.00657612
GO_REGULATION_OF_TELOMERE_MAINTENANCE	0.572503	2.00286	0	0.00667394
GO_REGULATION_OF_DNA_RECOMBINATION	0.571458	2.00254	0	0.00665886
GO_HOMOLOGOUS_CHROMOSOME_PAIRING_AT_MEIOSIS	0.651182	2.00168	0	0.00670201
GO_REGULATION_OF_GENE_SILENCING	0.562033	1.99792	0	0.00698049
GO_PYRIMIDINE_NUCLEOTIDE_METABOLIC_PROCESS	0.613128	1.99709	0.0021097	0.00703533
GO_PROTEIN_POLYUBIQUITINATION	0.455443	1.9957	0	0.00710945
GO_G0_TO_G1_TRANSITION	0.646916	1.99422	0	0.00715581
GO_REGULATION_OF_CELL_DIVISION	0.477523	1.99329	0	0.0071952
GO_RNA_PHOSPHODIESTER_BOND_HYDROLYSIS	0.513752	1.99214	0	0.00725827
GO_PROTEIN_CONTAINING_COMPLEX_DISASSEMBLY	0.459629	1.99175	0	0.00725393
GO_REGULATION_OF_ATP_METABOLIC_PROCESS	0.490396	1.99148	0	0.00726075
GO_GUANOSINE_CONTAINING_COMPOUND_METABOLIC_PROCESS	0.570546	1.99048	0	0.00729217
GO_NUCLEAR_EXPORT	0.549508	1.98964	0	0.00734956
GO_ESTABLISHMENT_OF_RNA_LOCALIZATION	0.561277	1.98953	0	0.00732002
GO_RNA_SPLICING	0.533883	1.98909	0.00596422	0.00730044
GO_PYRUVATE_METABOLIC_PROCESS	0.507734	1.98654	0	0.00750682
GO_POSITIVE_REGULATION_OF_CHROMOSOME_SEPARATION	0.747468	1.9865	0	0.00747223
GO_NCRNA_METABOLIC_PROCESS	0.547807	1.98639	0.00194553	0.00746084
GO_HISTONE_MRNA_METABOLIC_PROCESS	0.703463	1.98567	0	0.00750041
GO_BLASTOCYST_GROWTH	0.76791	1.98522	0	0.00749356
GO_REGULATION_OF_SPINDLE_ASSEMBLY	0.650971	1.98506	0	0.00746999
GO_PYRIMIDINE_CONTAINING_COMPOUND_BIOSYNTHETIC_PROCESS	0.611331	1.98487	0.00206186	0.00744836
GO_GLYCOSYL_COMPOUND_METABOLIC_PROCESS	0.515388	1.98362	0	0.00755696
GO_ERROR_FREE_TRANSLESION_SYNTHESIS	0.700475	1.98225	0	0.00758054
GO_MRNA_PROCESSING	0.531047	1.97996	0.00595238	0.00779811
GO_NUCLEAR_ENVELOPE_ORGANIZATION	0.543506	1.9798	0	0.00776748
GO_PROTEIN_LOCALIZATION_TO_CHROMOSOME_CENTROMERIC_REGION	0.803088	1.97931	0	0.00778867
GO_MITOTIC_G1_S_TRANSITION_CHECKPOINT	0.530759	1.97694	0	0.00794769
GO_NUCLEIC_ACID_PHOSPHODIESTER_BOND_HYDROLYSIS	0.503741	1.97653	0	0.0079679
GO_MITOTIC_G2_M_TRANSITION_CHECKPOINT	0.634329	1.97624	0.00203252	0.00796859
GO_NUCLEOTIDE_PHOSPHORYLATION	0.508084	1.97499	0	0.00806744
GO_POSITIVE_REGULATION_OF_CYTOKINESIS	0.690939	1.97428	0	0.00808059
GO_PYRIMIDINE_NUCLEOSIDE_TRIPHOSPHATE_METABOLIC_PROCESS	0.718881	1.97342	0	0.00813963
GO_DNA_DOUBLE_STRAND_BREAK_PROCESSING	0.73284	1.97314	0	0.00812201
GO_ESTABLISHMENT_OF_ORGANELLE_LOCALIZATION	0.431863	1.97288	0	0.00812692
GO_POSITIVE_REGULATION_OF_TELOMERASE_ACTIVITY	0.611768	1.97178	0	0.00818271
GO_POSITIVE_REGULATION_OF_CANONICAL_WNT_SIGNALING_PATHWAY	0.490988	1.97083	0	0.00828115
GO_REGULATION_OF_MEIOTIC_NUCLEAR_DIVISION	0.648495	1.96967	0	0.00840262
GO_IMPORT_INTO_NUCLEUS	0.500823	1.96882	0	0.00847785
GO_POSITIVE_REGULATION_OF_CHROMOSOME_ORGANIZATION	0.517607	1.96836	0	0.00847591
GO_NEGATIVE_REGULATION_OF_ORGANELLE_ORGANIZATION	0.437883	1.96814	0	0.00847205
GO_REGULATION_OF_CELLULAR_AMINE_METABOLIC_PROCESS	0.653292	1.96718	0	0.0085271
GO_GLYCOSYL_COMPOUND_BIOSYNTHETIC_PROCESS	0.586853	1.96401	0	0.00878575
GO_DNA_STRAND_ELONGATION_INVOLVED_IN_DNA_REPLICATION	0.881297	1.9627	0	0.00887309
GO_GTP_METABOLIC_PROCESS	0.59721	1.9619	0.00204082	0.00892064
GO_MORPHOGENESIS_OF_A_POLARIZED_EPITHELIUM	0.493954	1.95957	0	0.00911345
GO_REGULATION_OF_CELLULAR_AMINO_ACID_METABOLIC_PROCESS	0.709032	1.95681	0	0.00937041
GO_BLASTOCYST_DEVELOPMENT	0.50311	1.95679	0	0.00933262
GO_POSITIVE_REGULATION_OF_CELL_CYCLE_G2_M_PHASE_TRANSITION	0.713237	1.95391	0	0.00963431
GO_NCRNA_PROCESSING	0.545081	1.95286	0.00191571	0.00970691
GO_REGULATION_OF_DOUBLE_STRAND_BREAK_REPAIR_VIA_HOMOLOGOUS_RECOMBINATION	0.630111	1.95214	0	0.00977935
GO_SOMATIC_DIVERSIFICATION_OF_IMMUNE_RECEPTORS	0.535499	1.95173	0	0.00979541
GO_MRNA_EXPORT_FROM_NUCLEUS	0.610565	1.9509	0	0.00988064
GO_CYTOKINETIC_PROCESS	0.575683	1.94981	0	0.00997844
GO_CELLULAR_COMPONENT_DISASSEMBLY	0.403791	1.94936	0	0.0100079
GO_TETRAHYDROFOLATE_METABOLIC_PROCESS	0.765605	1.94885	0.002	0.0100258
GO_MRNA_TRANSPORT	0.572002	1.94622	0	0.0102708
GO_OOCYTE_MATURATION	0.625593	1.94604	0	0.0102596
GO_MICROTUBULE_ORGANIZING_CENTER_ORGANIZATION	0.53733	1.94395	0	0.0104612
GO_NUCLEOTIDE_EXCISION_REPAIR_DNA_GAP_FILLING	0.713622	1.94386	0.00414938	0.0104356
GO_RIBONUCLEOSIDE_TRIPHOSPHATE_METABOLIC_PROCESS	0.556284	1.94331	0	0.0104566
GO_CHROMATIN_ASSEMBLY_OR_DISASSEMBLY	0.579333	1.94291	0.0019802	0.0104448
GO_REGULATION_OF_CENTROSOME_DUPLICATION	0.597659	1.94183	0	0.0105531
GO_TRNA_PROCESSING	0.564778	1.94079	0	0.010602
GO_RIBONUCLEOPROTEIN_COMPLEX_SUBUNIT_ORGANIZATION	0.537149	1.94021	0.00193798	0.0106302
GO_RNA_5_END_PROCESSING	0.751188	1.93966	0.00194932	0.010645
GO_POST_TRANSLATIONAL_PROTEIN_MODIFICATION	0.426257	1.93959	0	0.0106174
GO_REGULATION_OF_SISTER_CHROMATID_COHESION	0.728467	1.93951	0	0.0105805
GO_NUCLEOBASE_CONTAINING_COMPOUND_TRANSPORT	0.503602	1.93942	0	0.0105522
GO_PROTEIN_LOCALIZATION_TO_KINETOCHORE	0.825038	1.93906	0	0.0105633
GO_PYRIMIDINE_NUCLEOSIDE_BIOSYNTHETIC_PROCESS	0.710573	1.93849	0.00205339	0.0105691
GO_NEGATIVE_REGULATION_OF_DNA_DEPENDENT_DNA_REPLICATION	0.745247	1.93586	0.00202429	0.0108486
GO_RNA_INTERFERENCE	0.7638	1.93564	0	0.0108179
GO_RESPONSE_TO_INTERLEUKIN_12	0.569134	1.93499	0.00395257	0.010861
GO_BASE_EXCISION_REPAIR	0.606749	1.93483	0.00411523	0.0108451
GO_REGULATION_OF_CELL_AGING	0.550416	1.93355	0	0.010934
GO_GLUTAMINE_METABOLIC_PROCESS	0.684532	1.93346	0	0.0109104
GO_TELOMERE_MAINTENANCE_VIA_SEMI_CONSERVATIVE_REPLICATION	0.768439	1.9325	0.00207469	0.0110311
GO_POSITIVE_REGULATION_OF_UBIQUITIN_PROTEIN_TRANSFERASE_ACTIVITY	0.556015	1.93167	0	0.0110735
GO_MICROTUBULE_CYTOSKELETON_ORGANIZATION	0.487571	1.93146	0.00212766	0.011055
GO_REGULATION_OF_TRANSCRIPTION_INVOLVED_IN_G1_S_TRANSITION_OF_MITOTIC_CELL_CYCLE	0.682731	1.93109	0.00614754	0.0110749
GO_PYRIMIDINE_NUCLEOTIDE_BIOSYNTHETIC_PROCESS	0.646061	1.92852	0	0.0113598
GO_REGULATION_OF_MICROTUBULE_CYTOSKELETON_ORGANIZATION	0.496945	1.92749	0	0.0114216
GO_NUCLEOSIDE_DIPHOSPHATE_METABOLIC_PROCESS	0.45732	1.92425	0	0.0118895
GO_REGULATION_OF_DNA_BIOSYNTHETIC_PROCESS	0.498545	1.92388	0.00201613	0.0119307
GO_TELOMERE_CAPPING	0.579371	1.9228	0	0.0120642
GO_TRNA_5_END_PROCESSING	0.811752	1.92233	0	0.0121005
GO_REGULATION_OF_GENERATION_OF_PRECURSOR_METABOLITES_AND_ENERGY	0.460276	1.92111	0.00214133	0.012253
GO_NON_CANONICAL_WNT_SIGNALING_PATHWAY	0.483591	1.91942	0	0.0124039
GO_RESPONSE_TO_INTERLEUKIN_1	0.486062	1.91783	0.00215054	0.0125752
GO_NUCLEOSIDE_TRIPHOSPHATE_METABOLIC_PROCESS	0.526228	1.91745	0.00199203	0.0125564
GO_REGULATION_OF_TRANSLATIONAL_INITIATION	0.53345	1.91714	0.006	0.0125825
GO_BINDING_OF_SPERM_TO_ZONA_PELLUCIDA	0.708619	1.91681	0	0.0125734
GO_PROTEIN_IMPORT	0.464398	1.91657	0	0.0125643
GO_DE_NOVO_PROTEIN_FOLDING	0.599617	1.91632	0.0019685	0.0125641
GO_RESPONSE_TO_UV	0.464968	1.91559	0	0.0126273
GO_PROTEIN_MONOUBIQUITINATION	0.545208	1.91539	0	0.0126176
GO_RIBOSOME_BIOGENESIS	0.580515	1.91359	0.00380952	0.0128255
GO_RNA_PHOSPHODIESTER_BOND_HYDROLYSIS_ENDONUCLEOLYTIC	0.518186	1.91277	0.00387597	0.0128708
GO_SOMATIC_DIVERSIFICATION_OF_IMMUNOGLOBULINS	0.518517	1.91176	0	0.013006
GO_DEOXYRIBONUCLEOTIDE_METABOLIC_PROCESS	0.642469	1.91125	0	0.0130291
GO_NIK_NF_KAPPAB_SIGNALING	0.466679	1.91117	0	0.0130029
GO_PURINE_NUCLEOSIDE_METABOLIC_PROCESS	0.520114	1.9091	0	0.0131732
GO_REGULATION_OF_POSTTRANSCRIPTIONAL_GENE_SILENCING	0.53903	1.90843	0.00203252	0.0132222
GO_NUCLEAR_TRANSCRIBED_MRNA_CATABOLIC_PROCESS_EXONUCLEOLYTIC	0.628629	1.90742	0	0.0133627
GO_POSITIVE_REGULATION_OF_VIRAL_GENOME_REPLICATION	0.577956	1.90731	0.002	0.0133248
GO_ESTABLISHMENT_OF_PROTEIN_LOCALIZATION_TO_TELOMERE	0.787133	1.9042	0	0.0137678
GO_MITOCHONDRIAL_RNA_METABOLIC_PROCESS	0.660088	1.90252	0	0.0139808
GO_REGULATION_OF_MITOTIC_SPINDLE_ASSEMBLY	0.69206	1.90176	0	0.0141018
GO_POSITIVE_REGULATION_OF_RESPONSE_TO_DNA_DAMAGE_STIMULUS	0.493732	1.90137	0	0.0141163
GO_RESPONSE_TO_X_RAY	0.607459	1.90077	0	0.0141374
GO_POSITIVE_REGULATION_OF_GENE_EXPRESSION_EPIGENETIC	0.563714	1.90074	0	0.0140921
GO_MRNA_METHYLATION	0.732119	1.90025	0	0.0141107
GO_FEMALE_GAMETE_GENERATION	0.481095	1.89539	0	0.0148241
GO_PROTEIN_LOCALIZATION_TO_MITOCHONDRION	0.482623	1.89452	0	0.014928
GO_CELL_CYCLE_ARREST	0.416767	1.89346	0	0.015033
GO_MITOCHONDRIAL_GENE_EXPRESSION	0.630799	1.89266	0.00582524	0.0151011
GO_NUCLEOSIDE_PHOSPHATE_BIOSYNTHETIC_PROCESS	0.448177	1.89185	0.00201613	0.0152113
GO_POSITIVE_REGULATION_OF_CYCLIN_DEPENDENT_PROTEIN_KINASE_ACTIVITY	0.580275	1.89179	0.00218341	0.0151731
GO_LIVER_REGENERATION	0.575369	1.89143	0.00401606	0.0151626
GO_MULTICELLULAR_ORGANISM_AGING	0.572896	1.88872	0.00196078	0.0156222
GO_NEGATIVE_REGULATION_OF_CELL_AGING	0.649352	1.88774	0.00412371	0.0157498
GO_NCRNA_EXPORT_FROM_NUCLEUS	0.698574	1.88455	0	0.0162499
GO_NEGATIVE_REGULATION_OF_RESPONSE_TO_DNA_DAMAGE_STIMULUS	0.477578	1.8838	0	0.0163856
GO_POSITIVE_REGULATION_OF_VIRAL_PROCESS	0.464793	1.88217	0.00203666	0.0165901
GO_NUCLEOTIDE_EXCISION_REPAIR_DNA_INCISION	0.593751	1.88113	0	0.0167268
GO_MISMATCH_REPAIR	0.629244	1.87853	0.00411523	0.017108
GO_GLUCOSE_CATABOLIC_PROCESS	0.646408	1.87849	0.00203252	0.0170559
GO_TRNA_TRANSPORT	0.704863	1.87816	0	0.0170567
GO_RNA_CATABOLIC_PROCESS	0.479312	1.8776	0	0.0171085
GO_NUCLEOBASE_CONTAINING_SMALL_MOLECULE_METABOLIC_PROCESS	0.394699	1.87633	0	0.0172874
GO_ANTIGEN_PROCESSING_AND_PRESENTATION_OF_EXOGENOUS_PEPTIDE_ANTIGEN_VIA_MHC_CLASS_I	0.636428	1.8762	0.00417537	0.0172463
GO_RIBOSE_PHOSPHATE_METABOLIC_PROCESS	0.399873	1.87619	0	0.0171945
GO_REGULATION_OF_NUCLEAR_CELL_CYCLE_DNA_REPLICATION	0.740833	1.87587	0.00204499	0.0171861
GO_RIBONUCLEOSIDE_METABOLIC_PROCESS	0.516581	1.8758	0.0021097	0.0171474
GO_DNA_TEMPLATED_TRANSCRIPTION_ELONGATION	0.525982	1.87575	0	0.0170964
GO_AMINO_ACID_ACTIVATION	0.667159	1.87531	0.00978474	0.0171271
GO_RETROGRADE_VESICLE_MEDIATED_TRANSPORT_GOLGI_TO_ENDOPLASMIC_RETICULUM	0.524542	1.87381	0.00401606	0.0173568
GO_SPLICEOSOMAL_SNRNP_ASSEMBLY	0.602779	1.87347	0	0.0173617
GO_ANTIGEN_PROCESSING_AND_PRESENTATION_OF_PEPTIDE_ANTIGEN	0.515456	1.87268	0.00212766	0.0174492
GO_CELL_AGING	0.473102	1.8696	0	0.0179514
GO_REGULATION_OF_CELL_CYCLE_ARREST	0.470318	1.86827	0.00400802	0.0180999
GO_REGULATION_OF_CELL_CYCLE_G1_S_PHASE_TRANSITION	0.441288	1.86794	0.00219298	0.0181295
GO_REGULATION_OF_CHROMATIN_BINDING	0.670793	1.86679	0	0.0183258
GO_RESPONSE_TO_OXYGEN_LEVELS	0.390939	1.86613	0	0.0183951
GO_RRNA_CONTAINING_RIBONUCLEOPROTEIN_COMPLEX_EXPORT_FROM_NUCLEUS	0.744072	1.86578	0.00197628	0.0184047
GO_PYRIMIDINE_NUCLEOSIDE_TRIPHOSPHATE_BIOSYNTHETIC_PROCESS	0.696549	1.86505	0.00210526	0.0185028
GO_PROTEIN_CONTAINING_COMPLEX_LOCALIZATION	0.477742	1.86354	0	0.0187023
GO_CHAPERONE_COFACTOR_DEPENDENT_PROTEIN_REFOLDING	0.608755	1.85895	0.00990099	0.0195071
GO_PROTEIN_LOCALIZATION_TO_CHROMOSOME_TELOMERIC_REGION	0.654423	1.8587	0.00198807	0.0195108
GO_ENDOPLASMIC_RETICULUM_TUBULAR_NETWORK_ORGANIZATION	0.690473	1.85723	0.0038835	0.0198002
GO_GLYCOLYTIC_PROCESS_THROUGH_FRUCTOSE_6_PHOSPHATE	0.704092	1.85666	0	0.0198254
GO_POSITIVE_REGULATION_OF_DNA_REPAIR	0.517928	1.85632	0	0.0198333
GO_REGULATION_OF_INNATE_IMMUNE_RESPONSE	0.468282	1.85568	0.00428265	0.0198979
GO_HEXOSE_CATABOLIC_PROCESS	0.549462	1.8555	0.00831601	0.0198719
GO_MATURATION_OF_5_8S_RRNA	0.641626	1.85362	0.00967118	0.020235
GO_REGULATION_OF_SMALL_MOLECULE_METABOLIC_PROCESS	0.386961	1.85322	0	0.0202691
GO_RRNA_METABOLIC_PROCESS	0.561944	1.85322	0.00389105	0.0202125
GO_REGULATION_OF_MICROTUBULE_BASED_PROCESS	0.466231	1.85196	0	0.020383
GO_POSITIVE_REGULATION_OF_WNT_SIGNALING_PATHWAY	0.441924	1.8515	0	0.0204425
GO_NEGATIVE_REGULATION_OF_RELEASE_OF_CYTOCHROME_C_FROM_MITOCHONDRIA	0.62451	1.85054	0.0039604	0.0205799
GO_RESPONSE_TO_GAMMA_RADIATION	0.502516	1.84878	0.00395257	0.0209272
GO_EXIT_FROM_MITOSIS	0.555145	1.84832	0.00204918	0.0209478
GO_DNA_DAMAGE_RESPONSE_SIGNAL_TRANSDUCTION_RESULTING_IN_TRANSCRIPTION	0.634239	1.84811	0.00392927	0.0209467
GO_CELLULAR_METABOLIC_COMPOUND_SALVAGE	0.579436	1.84802	0.00210084	0.0209076
GO_CARBOHYDRATE_CATABOLIC_PROCESS	0.427357	1.84712	0.00211864	0.0210267
GO_TRANSCRIPTION_ELONGATION_FROM_RNA_POLYMERASE_II_PROMOTER	0.52317	1.8468	0.0060241	0.0210495
GO_ERROR_PRONE_TRANSLESION_SYNTHESIS	0.679861	1.84622	0.010142	0.0211142
GO_POSITIVE_REGULATION_OF_PROTEIN_MODIFICATION_BY_SMALL_PROTEIN_CONJUGATION_OR_REMOVAL	0.425769	1.84186	0	0.0219641
GO_REGULATION_OF_TELOMERASE_ACTIVITY	0.533825	1.84105	0.00414938	0.0220701
GO_REGULATION_OF_PROTEIN_MODIFICATION_BY_SMALL_PROTEIN_CONJUGATION_OR_REMOVAL	0.406361	1.84102	0	0.0220296
GO_ESTABLISHMENT_OF_PROTEIN_LOCALIZATION_TO_CHROMOSOME	0.681962	1.83916	0	0.022352
GO_DNA_LIGATION	0.689483	1.8391	0.00410678	0.0223076
GO_PROTEIN_LOCALIZATION_TO_NUCLEUS	0.43583	1.83725	0	0.0227083
GO_PURINE_NUCLEOSIDE_TRIPHOSPHATE_METABOLIC_PROCESS	0.532382	1.83629	0.00595238	0.0228504
GO_MONOSACCHARIDE_CATABOLIC_PROCESS	0.527624	1.83533	0.00417537	0.0230006
GO_PROTEIN_LOCALIZATION_TO_CHROMATIN	0.612449	1.83474	0.00984252	0.0230516
GO_CENTROSOME_DUPLICATION	0.558221	1.8338	0	0.0231765
GO_RESPONSE_TO_INTERLEUKIN_7	0.558794	1.83092	0.00792079	0.023771
GO_REGULATION_OF_PROTEIN_LOCALIZATION_TO_NUCLEUS	0.454578	1.82966	0	0.0239914
GO_TRANSCRIPTION_PREINITIATION_COMPLEX_ASSEMBLY	0.559927	1.8293	0.0102249	0.0240086
GO_PURINE_CONTAINING_COMPOUND_METABOLIC_PROCESS	0.388617	1.82921	0	0.0239755
GO_NEGATIVE_REGULATION_OF_DNA_REPLICATION	0.623563	1.82882	0.00201613	0.0239814
GO_SOMATIC_RECOMBINATION_OF_IMMUNOGLOBULIN_GENE_SEGMENTS	0.511342	1.82877	0.004	0.0239269
GO_REGULATION_OF_MORPHOGENESIS_OF_AN_EPITHELIUM	0.452296	1.8284	0.00208768	0.0239586
GO_ANTIGEN_PROCESSING_AND_PRESENTATION_OF_PEPTIDE_ANTIGEN_VIA_MHC_CLASS_I	0.570704	1.82777	0.0104603	0.0240379
GO_POSITIVE_REGULATION_OF_TELOMERASE_RNA_LOCALIZATION_TO_CAJAL_BODY	0.803562	1.82631	0.00198807	0.0242972
GO_ANATOMICAL_STRUCTURE_HOMEOSTASIS	0.390132	1.8246	0	0.024682
GO_ESTABLISHMENT_OF_SPINDLE_ORIENTATION	0.578998	1.82406	0	0.0247234
GO_TUMOR_NECROSIS_FACTOR_MEDIATED_SIGNALING_PATHWAY	0.470046	1.82345	0.00217865	0.0248288
GO_RNA_POLYMERASE_II_PREINITIATION_COMPLEX_ASSEMBLY	0.641198	1.82314	0.00410678	0.0248347
GO_REGULATION_OF_CARBOHYDRATE_CATABOLIC_PROCESS	0.495797	1.82059	0	0.0254756
GO_CELLULAR_RESPONSE_TO_IONIZING_RADIATION	0.478999	1.82015	0.00408998	0.0255114
GO_CELLULAR_RESPONSE_TO_RADIATION	0.433115	1.81901	0	0.0257266
GO_NEGATIVE_REGULATION_OF_HISTONE_ACETYLATION	0.616844	1.81853	0.0039604	0.025767
GO_STEM_CELL_DIFFERENTIATION	0.416728	1.81772	0.00198413	0.0259573
GO_NEGATIVE_REGULATION_OF_MRNA_PROCESSING	0.628749	1.81677	0.00816326	0.0261111
GO_PROTEASOMAL_UBIQUITIN_INDEPENDENT_PROTEIN_CATABOLIC_PROCESS	0.766571	1.81443	0.00408998	0.026642
GO_SPERM_EGG_RECOGNITION	0.610624	1.81398	0.00194175	0.0266727
GO_CHROMATIN_REMODELING	0.502746	1.81292	0.010101	0.0267884
GO_ATTACHMENT_OF_MITOTIC_SPINDLE_MICROTUBULES_TO_KINETOCHORE	0.743614	1.81121	0.00204499	0.0271369
GO_NEGATIVE_REGULATION_OF_DNA_REPAIR	0.566901	1.8101	0	0.0273012
GO_CHAPERONE_MEDIATED_PROTEIN_FOLDING	0.52204	1.80938	0.00196464	0.0274101
GO_REGULATION_OF_NUCLEOTIDE_METABOLIC_PROCESS	0.458881	1.8091	0	0.0274142
GO_NEGATIVE_REGULATION_OF_GENE_EXPRESSION_EPIGENETIC	0.548587	1.80649	0.004	0.0280406
GO_REGULATION_OF_DOUBLE_STRAND_BREAK_REPAIR_VIA_NONHOMOLOGOUS_END_JOINING	0.562385	1.80594	0.0020202	0.028119
GO_ATP_METABOLIC_PROCESS	0.48397	1.8047	0.00785855	0.0283875
GO_POSITIVE_REGULATION_OF_TRANSLATION	0.441616	1.80201	0.00589391	0.029073
GO_TRANSCRIPTION_INITIATION_FROM_RNA_POLYMERASE_II_PROMOTER	0.41448	1.79946	0	0.0297856
GO_INTRINSIC_APOPTOTIC_SIGNALING_PATHWAY_IN_RESPONSE_TO_OXIDATIVE_STRESS	0.492391	1.79901	0.00210084	0.0298463
GO_ORGANELLE_DISASSEMBLY	0.419919	1.79625	0.00204082	0.0305712
GO_POSITIVE_REGULATION_OF_CELL_CYCLE_ARREST	0.468519	1.7956	0.00206612	0.0306994
GO_MITOCHONDRIAL_TRANSLATION	0.628565	1.79555	0.0117417	0.0306356
GO_HISTONE_H2A_UBIQUITINATION	0.595091	1.79451	0	0.0308561
GO_ONE_CARBON_METABOLIC_PROCESS	0.534366	1.79349	0.00589391	0.0310411
GO_DNA_TEMPLATED_TRANSCRIPTION_INITIATION	0.414894	1.7925	0	0.0312853
GO_PYRIMIDINE_RIBONUCLEOSIDE_TRIPHOSPHATE_METABOLIC_PROCESS	0.648368	1.79228	0.00793651	0.0312709
GO_REGULATION_OF_NUCLEASE_ACTIVITY	0.595372	1.79184	0.00598802	0.0312991
GO_REGULATION_OF_ESTABLISHMENT_OF_PROTEIN_LOCALIZATION_TO_MITOCHONDRION	0.452562	1.7917	0	0.0312446
GO_REGULATION_OF_GENE_EXPRESSION_EPIGENETIC	0.482351	1.78974	0.00601202	0.0317319
GO_NCRNA_3_END_PROCESSING	0.582169	1.78965	0.00972763	0.0316805
GO_TELOMERASE_RNA_LOCALIZATION	0.709614	1.78897	0.0039604	0.0318203
GO_PYRIMIDINE_NUCLEOSIDE_METABOLIC_PROCESS	0.578426	1.78864	0.00617284	0.0318279
GO_REGULATION_OF_CELLULAR_KETONE_METABOLIC_PROCESS	0.431479	1.78837	0.00408163	0.0318236
GO_MITOCHONDRIAL_TRANSPORT	0.436865	1.7881	0.00392927	0.0318439
GO_NUCLEOBASE_CONTAINING_SMALL_MOLECULE_INTERCONVERSION	0.601566	1.78717	0.00625	0.0320336
GO_NUCLEOSIDE_SALVAGE	0.657379	1.7862	0.0121212	0.0322332
GO_POSITIVE_REGULATION_OF_VIRAL_TRANSCRIPTION	0.544594	1.78518	0.00996016	0.0324633
GO_PROTEIN_TARGETING_TO_MITOCHONDRION	0.480887	1.78438	0.00408998	0.0326676
GO_MRNA_CLEAVAGE	0.656008	1.78361	0.00396825	0.0328292
GO_CLEAVAGE_INVOLVED_IN_RRNA_PROCESSING	0.643127	1.78307	0.0156556	0.0329149
GO_NUCLEOBASE_CONTAINING_SMALL_MOLECULE_BIOSYNTHETIC_PROCESS	0.457395	1.7824	0.00211864	0.0330349
GO_TERMINATION_OF_RNA_POLYMERASE_I_TRANSCRIPTION	0.596141	1.78204	0.0078125	0.0330495
GO_DEOXYRIBOSE_PHOSPHATE_CATABOLIC_PROCESS	0.623529	1.78133	0.0101833	0.0331774
GO_RESPONSE_TO_RADIATION	0.389416	1.7799	0	0.0335663
GO_NEGATIVE_REGULATION_OF_DNA_METABOLIC_PROCESS	0.468158	1.77985	0.00200401	0.0334941
GO_CELLULAR_SENESCENCE	0.478402	1.77902	0	0.0336843
GO_TRANSLATIONAL_TERMINATION	0.635781	1.77805	0.0176125	0.0338542
GO_ANIMAL_ORGAN_REGENERATION	0.468739	1.77803	0	0.0337844
GO_CELLULAR_RESPONSE_TO_ALKALOID	0.573471	1.77792	0.0106838	0.0337515
GO_MODULATION_BY_SYMBIONT_OF_HOST_PROCESS	0.5217	1.77786	0.00617284	0.033688
GO_PROTEIN_COMPLEX_OLIGOMERIZATION	0.379575	1.77754	0	0.0336963
GO_MITOCHONDRION_MORPHOGENESIS	0.580766	1.77713	0.00813008	0.0337129
GO_TRANSCRIPTION_BY_RNA_POLYMERASE_I	0.544562	1.77682	0.0183299	0.0337451
GO_ALDITOL_METABOLIC_PROCESS	0.633729	1.7766	0.00407332	0.0337515
GO_MEMBRANE_DOCKING	0.423265	1.77416	0.00631579	0.0345145
GO_PROTEIN_LOCALIZATION_TO_CYTOSKELETON	0.517165	1.77333	0.00407332	0.0346843
GO_VIRAL_LIFE_CYCLE	0.384365	1.77183	0	0.0351327
GO_CILIARY_BASAL_BODY_PLASMA_MEMBRANE_DOCKING	0.535564	1.77018	0.0108225	0.0354864
GO_PURINE_CONTAINING_COMPOUND_BIOSYNTHETIC_PROCESS	0.430646	1.76936	0.00197628	0.035671
GO_AMINE_METABOLIC_PROCESS	0.470865	1.7686	0.00627615	0.0358219
GO_HISTONE_H2A_MONOUBIQUITINATION	0.608846	1.76778	0.00391389	0.0360462
GO_APOPTOTIC_MITOCHONDRIAL_CHANGES	0.448016	1.7677	0.00407332	0.0359948
GO_PROTEIN_K63_LINKED_UBIQUITINATION	0.474152	1.76756	0.00401606	0.0359683
GO_RIBONUCLEOSIDE_TRIPHOSPHATE_BIOSYNTHETIC_PROCESS	0.550927	1.76742	0.0115163	0.0359303
GO_TRANSCRIPTION_ELONGATION_FROM_RNA_POLYMERASE_I_PROMOTER	0.607897	1.76694	0.0077821	0.0360168
GO_NUCLEOTIDE_EXCISION_REPAIR_DNA_DAMAGE_RECOGNITION	0.605786	1.76677	0.00618557	0.0359814
GO_RIBOSE_PHOSPHATE_BIOSYNTHETIC_PROCESS	0.432967	1.76608	0.00403226	0.0361073
GO_CELLULAR_AMINO_ACID_METABOLIC_PROCESS	0.428889	1.76585	0	0.0360966
GO_RNA_MODIFICATION	0.480568	1.76539	0.00967118	0.0361609
GO_TRANSCRIPTION_INITIATION_FROM_RNA_POLYMERASE_I_PROMOTER	0.566861	1.76536	0.0102669	0.0360903
GO_REGULATION_OF_MRNA_3_END_PROCESSING	0.609216	1.76462	0.0100402	0.0362386
GO_RNA_METHYLATION	0.531925	1.76444	0.00785855	0.0361959
GO_NEGATIVE_REGULATION_OF_MRNA_SPLICING_VIA_SPLICEOSOME	0.649427	1.764	0.0059761	0.0362491
GO_NUCLEOSIDE_TRIPHOSPHATE_BIOSYNTHETIC_PROCESS	0.526554	1.76369	0.00972763	0.0362658
GO_REGULATION_OF_CELLULAR_AMIDE_METABOLIC_PROCESS	0.391465	1.76175	0.00208333	0.0367818
GO_MITOTIC_CYTOKINETIC_PROCESS	0.562839	1.75944	0.00397614	0.0374358
GO_RNA_SPLICING_VIA_ENDONUCLEOLYTIC_CLEAVAGE_AND_LIGATION	0.636505	1.75929	0.00411523	0.03741
GO_NEGATIVE_REGULATION_OF_APOPTOTIC_SIGNALING_PATHWAY	0.388848	1.75803	0	0.0377884
GO_CELLULAR_RESPONSE_TO_UV	0.447352	1.75748	0.00404858	0.0379148
GO_MICROTUBULE_ORGANIZING_CENTER_LOCALIZATION	0.542655	1.75526	0.0121212	0.038507
GO_CELLULAR_KETONE_METABOLIC_PROCESS	0.420625	1.75375	0.00414938	0.0389472
GO_PROTEIN_TRANSMEMBRANE_TRANSPORT	0.489428	1.75177	0.00806452	0.039523
GO_MITOCHONDRIAL_RNA_PROCESSING	0.70756	1.75061	0.00968992	0.0398593
GO_POSITIVE_REGULATION_OF_DNA_TEMPLATED_TRANSCRIPTION_ELONGATION	0.602978	1.75025	0.0077821	0.0399295
GO_PROTEIN_IMPORT_INTO_MITOCHONDRIAL_MATRIX	0.698045	1.74861	0.00961539	0.0404453
GO_REGULATION_OF_CELL_CYCLE_CHECKPOINT	0.592928	1.7464	0.00612245	0.0411006
GO_RESPONSE_TO_LEUKEMIA_INHIBITORY_FACTOR	0.441356	1.74525	0.00398406	0.0414265
GO_NEGATIVE_REGULATION_OF_CELLULAR_SENESCENCE	0.629647	1.74523	0.0101626	0.0413479
GO_PYRIMIDINE_RIBONUCLEOTIDE_METABOLIC_PROCESS	0.559648	1.744	0.00792079	0.0417222
GO_TRNA_METHYLATION	0.589996	1.7414	0.00984252	0.0425207
GO_ANTIGEN_PROCESSING_AND_PRESENTATION_OF_PEPTIDE_OR_POLYSACCHARIDE_ANTIGEN_VIA_MHC_CLASS_II	0.455524	1.74011	0.0103734	0.0429963
GO_PYRIMIDINE_DEOXYRIBONUCLEOTIDE_METABOLIC_PROCESS	0.64184	1.73942	0.0168067	0.0432177
GO_MIDBODY_ABSCISSION	0.5979	1.7394	0.00412371	0.0431338
GO_POSITIVE_REGULATION_OF_MRNA_PROCESSING	0.599118	1.73671	0.010142	0.0439975
GO_PROTEIN_TRANSMEMBRANE_IMPORT_INTO_INTRACELLULAR_ORGANELLE	0.575689	1.7356	0.0116959	0.0443057
GO_MITOCHONDRIAL_TRANSLATIONAL_TERMINATION	0.653466	1.73523	0.0232558	0.0443276
GO_REGULATION_OF_RESPONSE_TO_BIOTIC_STIMULUS	0.408991	1.73513	0.0125261	0.0442857
GO_POSITIVE_REGULATION_OF_MICROTUBULE_POLYMERIZATION_OR_DEPOLYMERIZATION	0.529297	1.73302	0.012766	0.0449334
GO_ANTIGEN_PROCESSING_AND_PRESENTATION	0.460477	1.73252	0.0166667	0.0450107
GO_SUBSTANTIA_NIGRA_DEVELOPMENT	0.518015	1.73231	0.0168776	0.0449961
GO_NEGATIVE_REGULATION_OF_CHROMATIN_ORGANIZATION	0.515633	1.73171	0.00823045	0.0451639
GO_NEGATIVE_REGULATION_OF_CELL_CYCLE_G1_S_PHASE_TRANSITION	0.431109	1.73101	0.00424628	0.0453311
GO_REGULATION_OF_EXIT_FROM_MITOSIS	0.60685	1.73075	0.0105042	0.0453294
GO_MITOCHONDRIAL_MEMBRANE_ORGANIZATION	0.472774	1.73012	0.0118577	0.0454541
GO_TRNA_MODIFICATION	0.517393	1.72979	0.00965251	0.0454956
GO_RESPONSE_TO_ARSENIC_CONTAINING_SUBSTANCE	0.500869	1.72928	0.00608519	0.0455945
GO_MATURATION_OF_5_8S_RRNA_FROM_TRICISTRONIC_RRNA_TRANSCRIPT_SSU_RRNA_5_8S_RRNA_LSU_RRNA	0.634089	1.7289	0.0295858	0.0456608
GO_TRANSLATIONAL_ELONGATION	0.566197	1.72868	0.0248566	0.0456359
GO_GENERATION_OF_PRECURSOR_METABOLITES_AND_ENERGY	0.423136	1.72856	0.0059761	0.0455745
GO_POSITIVE_REGULATION_OF_TRANSCRIPTION_INITIATION_FROM_RNA_POLYMERASE_II_PROMOTER	0.523404	1.72562	0.0100604	0.0466096
GO_CELLULAR_RESPONSE_TO_LIGHT_STIMULUS	0.424964	1.72347	0.00404858	0.0474054
GO_POSITIVE_REGULATION_OF_DOUBLE_STRAND_BREAK_REPAIR	0.527944	1.72319	0.00589391	0.0474166
GO_RNA_POLYADENYLATION	0.556422	1.72266	0.0212355	0.0475419
GO_RRNA_TRANSCRIPTION	0.61201	1.72065	0.0102041	0.0481998
GO_PROTEIN_LOCALIZATION_TO_MICROTUBULE_ORGANIZING_CENTER	0.565947	1.71792	0.0121212	0.0492139
GO_PROTEIN_REFOLDING	0.609754	1.71753	0.0143149	0.0492917
GO_REGULATION_OF_TYPE_I_INTERFERON_MEDIATED_SIGNALING_PATHWAY	0.528428	1.71655	0.0105263	0.049579
GO_TRICARBOXYLIC_ACID_CYCLE	0.602501	1.71557	0.0287908	0.0498807
GO_MATURATION_OF_SSU_RRNA	0.604564	1.71523	0.0329457	0.0499115
Abbreviation: ES, enrichment score; NES, normalized enrichment score; NOM, nominal; FDR, false discovery rateGene sets with NOM P-value <0.05 and FDR q-value <0.05 were considered as significantly enriched
