# Supplementary material for: Identification of HMMR as a prognostic biomarker for patients with lung adenocarcinoma via integrated bioinformatics analysis
Source: PeerJ. 2021 Dec 22;9:e12624. doi: 10.7717/peerj.12624 (PMC8710063; doi:10.7717/peerj.12624)
Supplement: Supplemental Information 8 — Abbreviation: ES, enrichment score; NES, normalized enrichment score; NOM, nominal; FDR, false discovery rateGene sets with NOM p-value < 0.05 and FDR q-value < 0.05 were considered as significantly enriched. [file peerj-09-12624-s008.xlsx]

## Sheet: Sheet1
Table S8. Gene set enrichment analysis for the subgroups with high HMMR expression responding to HALLMARK gene sets.
NAME	ES	NES	NOM p-val	FDR q-val
HALLMARK_MTORC1_SIGNALING	0.659675	2.25405	<0.001	<0.001
HALLMARK_G2M_CHECKPOINT	0.782637	2.23501	<0.001	<0.001
HALLMARK_MYC_TARGETS_V1	0.762712	2.2217	<0.001	<0.001
HALLMARK_E2F_TARGETS	0.817347	2.19608	<0.001	<0.001
HALLMARK_DNA_REPAIR	0.577306	2.15276	<0.001	<0.001
HALLMARK_UNFOLDED_PROTEIN_RESPONSE	0.544655	2.0332	<0.001	0.00289051
HALLMARK_SPERMATOGENESIS	0.578675	1.9431	0.00187266	0.00935967
HALLMARK_PI3K_AKT_MTOR_SIGNALING	0.477168	1.92226	<0.001	0.0113917
HALLMARK_MITOTIC_SPINDLE	0.544105	1.90413	0.00394477	0.0112992
HALLMARK_MYC_TARGETS_V2	0.69161	1.88454	0.00994036	0.0127919
HALLMARK_GLYCOLYSIS	0.477539	1.85043	0.00192308	0.0163159
Abbreviation: ES, enrichment score; NES, normalized enrichment score; NOM, nominal; FDR, false discovery rateGene sets with NOM P-value <0.05 and FDR q-value <0.05 were considered as significantly enriched
