# Supplementary material for: Identification of HMMR as a prognostic biomarker for patients with lung adenocarcinoma via integrated bioinformatics analysis
Source: PeerJ. 2021 Dec 22;9:e12624. doi: 10.7717/peerj.12624 (PMC8710063; doi:10.7717/peerj.12624)
Supplement: Supplemental Information 9 — Abbreviation: KEGG, Kyoto Encyclopedia of Genes and Genomes; ES, enrichment score; NES, normalized enrichment score; NOM, nominal; FDR, false discovery rateGene sets with NOM p-value < 0.05 and FDR q-value < 0.05 were considered as significantly enriched. [file peerj-09-12624-s009.xlsx]

## Sheet: Sheet1
Table S9. Gene set enrichment analysis for the subgroups with high HMMR expression responding to KEGG gene sets.
NAME	ES	NES	NOM p-val	FDR q-val
KEGG_CELL_CYCLE	0.719789	2.3972	<0.001	<0.001
KEGG_OOCYTE_MEIOSIS	0.6198	2.32341	<0.001	<0.001
KEGG_PYRIMIDINE_METABOLISM	0.604284	2.23664	<0.001	<0.001
KEGG_SPLICEOSOME	0.658732	2.19955	<0.001	<0.001
KEGG_BASAL_TRANSCRIPTION_FACTORS	0.684084	2.10758	<0.001	0.0047666
KEGG_PROGESTERONE_MEDIATED_OOCYTE_MATURATION	0.573545	2.09589	<0.001	0.00449953
KEGG_PURINE_METABOLISM	0.496876	2.07278	<0.001	0.00573512
KEGG_DNA_REPLICATION	0.824101	2.07041	<0.001	0.00501823
KEGG_NUCLEOTIDE_EXCISION_REPAIR	0.654707	2.06248	<0.001	0.00495168
KEGG_BASE_EXCISION_REPAIR	0.674358	2.0381	0.00396825	0.00679549
KEGG_RNA_DEGRADATION	0.600258	1.98917	<0.001	0.0106542
KEGG_UBIQUITIN_MEDIATED_PROTEOLYSIS	0.504057	1.98208	<0.001	0.0108005
KEGG_PROTEASOME	0.801145	1.98053	<0.001	0.0102235
KEGG_MISMATCH_REPAIR	0.760964	1.96744	<0.001	0.0113979
KEGG_ONE_CARBON_POOL_BY_FOLATE	0.715434	1.89897	0.00198413	0.0228555
KEGG_P53_SIGNALING_PATHWAY	0.501505	1.85652	0.00400802	0.0325062
KEGG_HOMOLOGOUS_RECOMBINATION	0.701795	1.81306	0.00423729	0.0467258
Abbreviation: ES, enrichment score; NES, normalized enrichment score; NOM, nominal; FDR, false discovery rateGene sets with NOM P-value <0.05 and FDR q-value <0.05 were considered as significantly enriched
